# Supplementary material for: Effect of Treatment of Clinical Seizures vs Electrographic Seizures in Full-Term and Near-Term Neonates: A Randomized Clinical Trial
Source: PubMed Central journal article supplement (PMC8683963; doi:10.1001/jamanetworkopen.2021.39604), 2021-12-17

## Supplemental Online Content

Hunt RW, Liley HG, Wagh D, et al; Newborn Electrographic Seizure Trial Investigators. Effect of treatment of clinical seizures vs electrographic seizures in full-term and near-term neonates: a randomized clinical trial. *JAMA Netw Open*. 2021;4(12):e2139604. doi:10.1001/jamanetworkopen.2021.39604

eFigure. Treatment Algorithm for Seizures

This supplemental material has been provided by the authors to give readers additional information about their work.

eFigure. Treatment Algorithm for Seizures

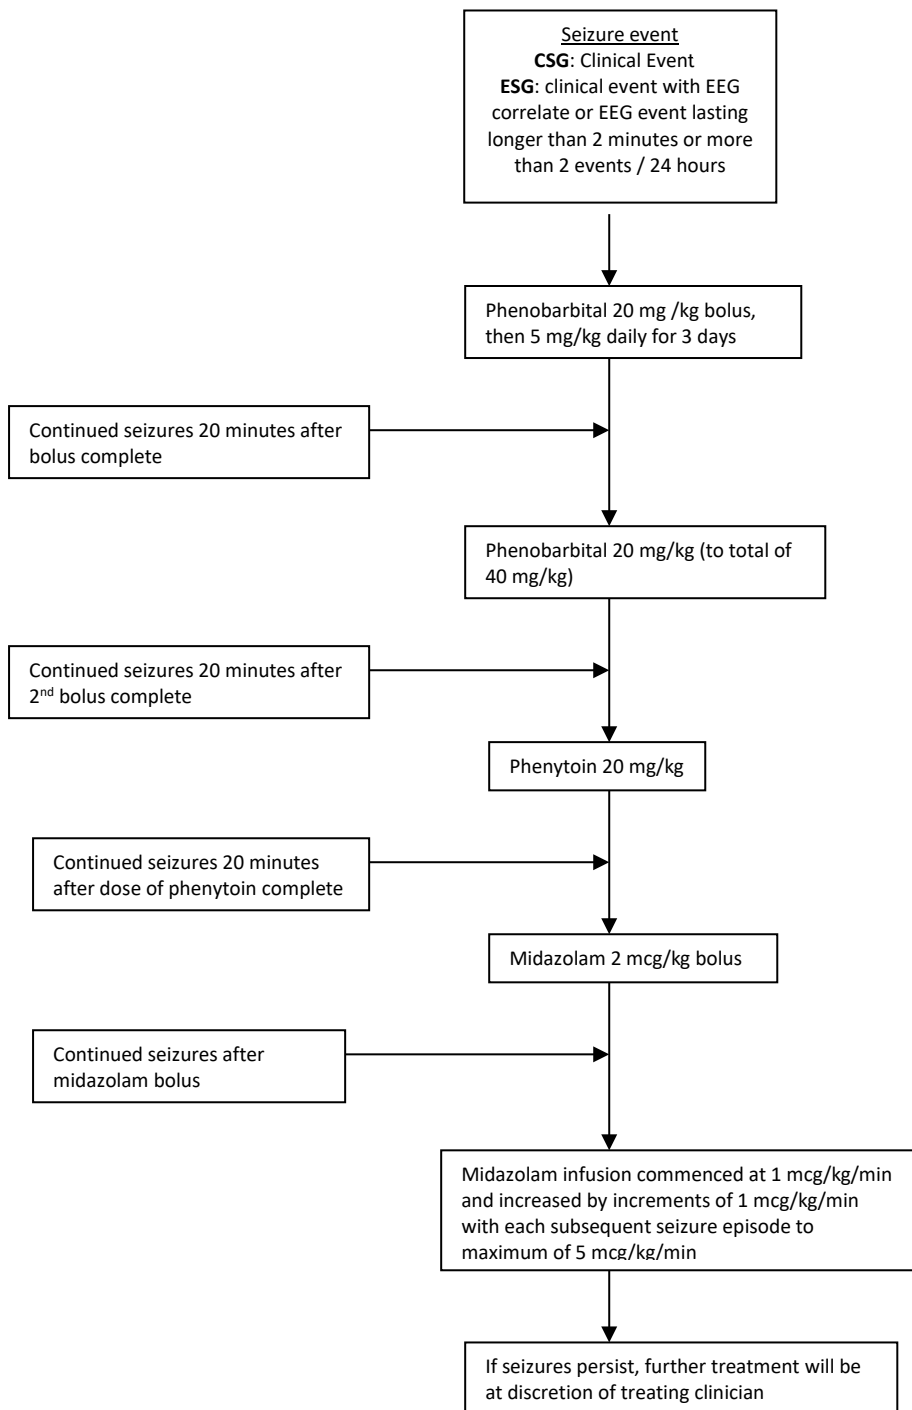

Supplement: jamanetwopen-e2139604-s002.pdf [file jamanetwopen-e2139604-s002.pdf]
