# Supplementary material for: Effect of Treatment of Clinical Seizures vs Electrographic Seizures in Full-Term and Near-Term Neonates: A Randomized Clinical Trial
Source: PubMed Central journal article supplement (PMC8683963; doi:10.1001/jamanetworkopen.2021.39604), 2021-12-17
Supplement: jamanetwopen-e2139604-s003.pdf [file jamanetwopen-e2139604-s003.pdf]

\*Indicates required information. Only first name, last name, and suffix will appear in PubMed.

| <b>*Group Name(s): Newborn Electrographic Seizure Trial Investigators</b> |                   |                              |                  |                                     |                                          |                                                         |                                                                                            |
|---------------------------------------------------------------------------|-------------------|------------------------------|------------------|-------------------------------------|------------------------------------------|---------------------------------------------------------|--------------------------------------------------------------------------------------------|
| <b>*First Name and Middle Initial(s)</b>                                  | <b>*Last Name</b> | <b>*Suffix (eg, Jr, III)</b> | Academic Degrees | Institution                         | Location (city, state/province, country) | Role or Contribution, eg, chair, principal investigator | Group (if more than 1 Group listed in the byline and/or Subgroup (eg, Steering Committee)) |
| Susan E                                                                   | Jacobs            |                              | MD               | The Royal Women's Hospital          | Melbourne, Vic, Australia                | Site Associate Investigator                             |                                                                                            |
| Connie                                                                    | Wong              |                              |                  | The Royal Women's Hospital          | Melbourne, Vic, Australia                | Research Nurse                                          |                                                                                            |
| Emma                                                                      | Yeomans           |                              |                  | Monash Children's Hospital          | Melbourne, Vic, Australia                | Research Nurse                                          |                                                                                            |
| Kristy                                                                    | Elsayed           |                              |                  | Monash Children's Hospital          | Melbourne, Vic, Australia                | Research Nurse                                          |                                                                                            |
| Judith                                                                    | Macey             |                              |                  | Mater Mother's Hospital             | Brisbane, Qld, Australia                 | Research Nurse                                          |                                                                                            |
| Jan                                                                       | Stewart           |                              |                  | The Children's Hospital             | Westmead, NSW, Australia                 | Research Nurse                                          |                                                                                            |
| Karen                                                                     | Simmer            |                              | PhD              | King Edward Memorial Hospital       | Perth, WA, Australia                     | Site Associate Investigator                             |                                                                                            |
| Yen                                                                       | Kok               |                              |                  | King Edward Memorial Hospital       | Perth, WA, Australia                     | Research Nurse                                          |                                                                                            |
| Ross                                                                      | Black             |                              |                  | John Hunter Children's Hospital     | Newcastle, NSW, Australia                | Research Nurse                                          |                                                                                            |
| Lisa                                                                      | McKeown           |                              |                  | Royal Brisbane and Women's Hospital | Brisbane, Qld, Australia                 | Research Nurse                                          |                                                                                            |
| Nicky                                                                     | Roberts           |                              |                  | King Edward Memorial Hospital       | Perth, WA, Australia                     | Research Nurse                                          |                                                                                            |
| Nirmal K                                                                  | Visruthan         |                              |                  | KK Women's and Children's Hospital  | Singapore                                | Research Nurse                                          |                                                                                            |
| Rowena                                                                    | Dela Puerta       |                              |                  | KK Women's and Children's Hospital  | Singapore                                | Research Nurse                                          |                                                                                            |
| Stacey                                                                    | Worthington       |                              |                  | King Edward Memorial Hospital       | Perth, WA, Australia                     | Research Nurse                                          |                                                                                            |
