# Supplementary material for: Effect of Treatment of Clinical Seizures vs Electrographic Seizures in Full-Term and Near-Term Neonates: A Randomized Clinical Trial
Source: PubMed Central journal article supplement (PMC8683963; doi:10.1001/jamanetworkopen.2021.39604), 2021-12-17
Supplement: jamanetwopen-e2139604-s004.pdf [file jamanetwopen-e2139604-s004.pdf]

## Data Sharing Statement

Hunt RW, Liley HG, Wagh D, et al; Newborn Electrographic Seizure Trial Investigators. Effect of treatment of clinical seizures vs electrographic seizures in full-term and near-term neonates: a randomized clinical trial. *JAMA Netw Open*. 2021;4(12):e2139604. doi:10.1001/jamanetworkopen.2021.39604

### Data

**Data available:** Yes

**Data types:** Deidentified participant data, Data dictionary

**How to access data:** Deidentified participant data and data request will be made available upon reasonable request to the corresponding author: Professor Rod Hunt

[rod.hunt@monash.edu](mailto:rod.hunt@monash.edu)

**When available:** With publication

### Supporting Documents

**Document types:** None

### Additional Information

**Who can access the data:** Researchers whose proposed use of the data has been approved.

**Types of analyses:** Systematic review with either meta-analysis or individual patient data analysis

**Mechanisms of data availability:** with investigator support

**Any additional restrictions:** nil
